# Supplementary material
Source: PubMed Central journal article supplement (PMC6325300)
Supplement: ba028241-suppl1.pdf [file ba028241-suppl1.pdf]

## Supplemental Methods

Supplemental Table 1. Definition and extraction of geriatric and laboratory variables

| <b>Variables</b>                                   | <b>Definition</b>                                                                                                                                                                                                                                                                                                                                                                                                                                                                                                                                                          | <b>Extraction Time</b>                                    |
|----------------------------------------------------|----------------------------------------------------------------------------------------------------------------------------------------------------------------------------------------------------------------------------------------------------------------------------------------------------------------------------------------------------------------------------------------------------------------------------------------------------------------------------------------------------------------------------------------------------------------------------|-----------------------------------------------------------|
| <b>Delirium</b>                                    | An acute, transient, usually reversible, fluctuating disturbance in attention, usually associated with either disorganized thinking and cognition, or altered level of consciousness based on Confusion Assessment Method (CAM) <sup>32</sup> . Primary neurological events such as seizure, stroke, or significant hemorrhage were excluded.                                                                                                                                                                                                                              | Start of conditioning to 100 days post stem cell infusion |
| <b>Fall</b>                                        | A patient coming to rest on the ground or another lower level; sometimes a body part strikes against an object that breaks the fall <sup>37</sup> . Syncope, loss of consciousness, or primary neurological events were excluded.                                                                                                                                                                                                                                                                                                                                          | Start of conditioning to 100 days post stem cell infusion |
| <b>Activities of Daily Living (ADL)</b>            | Bathing, dressing, toileting, transferring, continence, and feeding.                                                                                                                                                                                                                                                                                                                                                                                                                                                                                                       | Within 2 weeks of transplant admission                    |
| <b>Potentially inappropriate medications (PIM)</b> | Defined by 2015 American Geriatrics Society (AGS) Beers Criteria <sup>33</sup> . Some examples include daily use of following drug categories: <ol style="list-style-type: none"> <li>1. First-generation antihistamines (anticholinergics)</li> <li>2. Antispasmodics</li> <li>3. Central or peripheral alpha blockers</li> <li>4. Short and long-acting benzodiazepines</li> <li>5. Barbiturates</li> <li>6. Antidepressants with anticholinergic activity</li> <li>7. Proton-pump inhibitors</li> <li>8. Sliding scale insulin and long-acting sulfonylureas</li> </ol> | Within 2 weeks of transplant admission                    |

|                                       |                                                                                                       |                                        |
|---------------------------------------|-------------------------------------------------------------------------------------------------------|----------------------------------------|
|                                       | 9. Pain medications (meperidine, nonsteroidal anti-inflammatory drugs, and skeletal muscle relaxants) |                                        |
| <b>Prior falls</b>                    | Any fall within the last year.                                                                        | Within 2 weeks of transplant admission |
| <b>Weight loss</b>                    | More than 10 pounds within the last 3 months.                                                         | Within 2 weeks of transplant admission |
| <b>Albumin level (g/dL)</b>           | Serum albumin level in gram/deciliter                                                                 | Within 2 weeks of transplant admission |
| <b>Platelet (k/<math>\mu</math>L)</b> | Platelet in 1,000/microliter                                                                          | Within 2 weeks of transplant admission |
| <b>Creatinine clearance (mL/min)</b>  | Creatinine clearance calculated by the Cockcroft-Gault Equation in milliliter/minute                  | Within 2 weeks of transplant admission |

Supplemental Table 2. Univariates associated with delirium and fall

|                        |                | Delirium  |                  |              | Fall      |                  |              |
|------------------------|----------------|-----------|------------------|--------------|-----------|------------------|--------------|
|                        |                | No./Total | HR (95% CI)      | <i>p</i>     | No./Total | HR (95% CI)      | <i>p</i>     |
| <b>Age</b>             |                |           |                  | <b>0.065</b> |           |                  | <b>0.017</b> |
|                        | <70            | 104/466   | Reference        |              | 25/466    | Reference        |              |
|                        | ≥70            | 8/61      | 0.54 (0.26-1.11) |              | 9/61      | 2.77 (1.29-5.93) |              |
| <b>Gender</b>          |                |           |                  | <b>0.006</b> |           |                  | 0.245        |
|                        | Female         | 56/203    | Reference        |              | 10/203    | Reference        |              |
|                        | Male           | 56/324    | 0.59 (0.41-0.86) |              | 24/324    | 1.53 (0.73-3.2)  |              |
| <b>Transplant year</b> |                |           |                  | <b>0.096</b> |           |                  | 0.499        |
|                        | <2010          | 32/121    | Reference        |              | 6/121     | Reference        |              |
|                        | ≥2010          | 80/406    | 0.70 (0.46-1.05) |              | 28/406    | 1.34 (0.56-3.24) |              |
| <b>KPS</b>             |                |           |                  | 0.227        |           |                  | 0.497        |
|                        | ≥90            | 50/261    | Reference        |              | 19/261    | Reference        |              |
|                        | <90            | 62/266    | 1.26 (0.87-1.82) |              | 15/266    | 0.79 (0.4-1.56)  |              |
| <b>HCT-CI</b>          |                |           |                  | <b>0.086</b> |           |                  | 0.432        |
|                        | 0-2            | 42/233    | Reference        |              | 13/233    | Reference        |              |
|                        | ≥3             | 70/294    | 1.39 (0.95-2.04) |              | 21/294    | 1.32 (0.66-2.63) |              |
| <b>DRI, revised</b>    |                |           |                  | 0.218        |           |                  | <b>0.09</b>  |
|                        | Low/Interm.    | 77/386    | Reference        |              | 29/386    | Reference        |              |
|                        | High/very high | 35/141    | 1.29 (0.87-1.93) |              | 5/141     | 0.47 (0.18-1.21) |              |
| <b>Graft source</b>    |                |           |                  | <b>0.006</b> |           |                  | 0.459        |
|                        | BM             | 12/40     | Reference        |              | 2/40      | Reference        |              |
|                        | PBSC           | 85/453    | 0.61 (0.34-1.12) |              | 28/453    | 1.24 (0.3-5.21)  |              |
|                        | CBU            | 15/34     | 1.55 (0.72-3.31) |              | 4/34      | 2.47 (0.45-13.5) |              |
| <b>GVHD prophy.</b>    |                |           |                  | 0.797        |           |                  | 0.43         |
|                        | CD34+          | 47/241    | Reference        |              | 12/241    | Reference        |              |
|                        | Unmodified     | 61/265    | 1.13 (0.77-1.65) |              | 20/265    | 1.52 (0.74-3.12) |              |
|                        | PT-Cy          | 4/21      | 0.94 (0.34-2.6)  |              | 2/21      | 1.97 (0.44-8.82) |              |
| <b>Conditioning</b>    |                |           |                  | 0.408        |           |                  | <b>0.034</b> |
|                        | Myeloablative  | 72/327    | Reference        |              | 15/327    | Reference        |              |
|                        | RIC/NMA        | 40/200    | 0.85 (0.58-1.25) |              | 19/200    | 2.07 (1.05-4.08) |              |
| <b>Recipient CMV</b>   |                |           |                  | >0.99        |           |                  | 0.882        |
|                        | Negative       | 44/208    | Reference        |              | 14/208    | Reference        |              |
|                        | Positive       | 68/319    | 1.0 (0.68-1.46)  |              | 20/319    | 0.95 (0.48-1.88) |              |
| <b>ADL</b>             |                |           |                  | 0.141        |           |                  | <b>0.004</b> |
|                        | Normal         | 105/507   | Reference        |              | 29/507    | Reference        |              |
|                        | Impaired       | 7/20      | 1.87 (0.87-4.03) |              | 5/20      | 5.49 (2.12-14.2) |              |

|                                       |                |         |                  |                  |        |                  |
|---------------------------------------|----------------|---------|------------------|------------------|--------|------------------|
| <i>PIM user</i>                       |                |         |                  | <b>0.003</b>     |        | 0.373            |
|                                       | <b>No</b>      | 47/284  | Reference        |                  | 16/284 | Reference        |
|                                       | <b>Yes</b>     | 65/243  | 1.75 (1.21-2.55) |                  | 18/243 | 1.36 (0.69-2.66) |
| <i>Prior falls</i>                    |                |         |                  | <b>&lt;0.001</b> |        | <b>0.056</b>     |
|                                       | <b>No</b>      | 77/427  | Reference        |                  | 23/427 | Reference        |
|                                       | <b>Yes</b>     | 35/99   | 2.18 (1.46-3.25) |                  | 11/99  | 2.09 (1.02-4.29) |
| <i>Weight loss</i>                    |                |         |                  | 0.453            |        | 0.947            |
|                                       | <b>No</b>      | 95/435  | Reference        |                  | 28/435 | Reference        |
|                                       | <b>Yes</b>     | 17/92   | 0.82 (0.49-1.38) |                  | 6/92   | 1.03 (0.43-2.49) |
| <i>Albumin</i>                        |                |         |                  | 0.128            |        | 0.152            |
|                                       | <b>&lt;3.5</b> | 10/31   | Reference        |                  | 4/31   | Reference        |
|                                       | <b>≥3.5</b>    | 102/496 | 0.58 (0.30-1.11) |                  | 30/496 | 0.43 (0.15-1.21) |
| <i>Platelet (k/<math>\mu</math>L)</i> |                |         |                  | <b>0.002</b>     |        | 0.709            |
|                                       | <b>≥50</b>     | 87/459  | Reference        |                  | 29/459 | Reference        |
|                                       | <b>&lt;50</b>  | 25/68   | 2.15 (1.38-3.36) |                  | 5/68   | 1.2 (0.47-3.11)  |
| <i>Creatinine Cl.</i>                 |                |         |                  | <b>0.009</b>     |        | 0.793            |
|                                       | <b>≥60</b>     | 93/472  | Reference        |                  | 31/472 | Reference        |
|                                       | <b>&lt;60</b>  | 19/55   | 2.03 (1.24-3.33) |                  | 3/55   | 0.86 (0.26-2.8)  |

**Abbreviations:** No., Number of events; Total, Number of patients with each variable; HR, Hazard Ratio; CI, Confidence Interval; KPS, Karnofsky Performance Scale; HCT-CI, Hematopoietic cell transplantation-comorbidity index; DRI, Disease Risk Index; Interm., Intermediate; BM, Bone Marrow; PBSC, Peripheral Blood Stem Cell; CBU, Cord Blood Unit; RIC/NMA, Reduced-intensity/non-myeloablative conditioning; CMV, Cytomegalovirus; GVHD, Graft versus host disease; PT-Cy, Post-transplant cyclophosphamide; ADL, Activities of Daily Living; PIM, Potentially inappropriate medication; Creatinine Cl., Creatinine Clearance in milliliter/minute

Supplemental Table 3. Univariates associated with NRM and OS

|                               | NRM       |                  |                  | OS        |                  |                  |
|-------------------------------|-----------|------------------|------------------|-----------|------------------|------------------|
|                               | No./Total | HR (95% CI)      | <i>p</i>         | No./Total | HR (95% CI)      | <i>p</i>         |
| <b><i>Delirium (d100)</i></b> |           |                  | <b>0.004</b>     |           |                  | 0.224            |
| <b>No</b>                     | 82/362    | Reference        |                  | 192/389   | Reference        |                  |
| <b>Yes</b>                    | 32/71     | 1.88 (1.24-2.85) |                  | 44/76     | 1.23 (0.89-1.72) |                  |
| <b><i>Fall (d100)</i></b>     |           |                  | <b>0.018</b>     |           |                  | <b>0.055</b>     |
| <b>No</b>                     | 102/409   | Reference        |                  | 218/437   | Reference        |                  |
| <b>Yes</b>                    | 12/24     | 2.23 (1.23-4.07) |                  | 18/28     | 1.66 (1.03-2.68) |                  |
| <b><i>Age</i></b>             |           |                  | 0.55             |           |                  | 0.997            |
| <b>&lt;70</b>                 | 152/466   | Reference        |                  | 266/466   | Reference        |                  |
| <b>≥70</b>                    | 15/61     | 0.85 (0.5-1.45)  |                  | 32/61     | 1 (0.69-1.44)    |                  |
| <b><i>Gender</i></b>          |           |                  | 0.571            |           |                  | 0.387            |
| <b>Female</b>                 | 62/203    | Reference        |                  | 108/203   | Reference        |                  |
| <b>Male</b>                   | 105/324   | 1.1 (0.8-1.5)    |                  | 190/324   | 1.11 (0.88-1.41) |                  |
| <b><i>Transplant year</i></b> |           |                  | <b>0.019</b>     |           |                  | 0.106            |
| <b>&lt;2010</b>               | 56/121    | Reference        |                  | 87/121    | Reference        |                  |
| <b>≥2010</b>                  | 111/406   | 0.66 (0.48-0.93) |                  | 211/406   | 0.81 (0.62-1.04) |                  |
| <b><i>KPS</i></b>             |           |                  | <b>0.01</b>      |           |                  | <b>0.031</b>     |
| <b>≥90</b>                    | 69/261    | Reference        |                  | 134/261   | Reference        |                  |
| <b>&lt;90</b>                 | 98/266    | 1.5 (1.1-2.05)   |                  | 164/266   | 1.29 (1.02-1.62) |                  |
| <b><i>HCT-CI</i></b>          |           |                  | <b>&lt;0.001</b> |           |                  | <b>0.001</b>     |
| <b>0-2</b>                    | 55/233    | Reference        |                  | 118/233   | Reference        |                  |
| <b>≥3</b>                     | 112/294   | 1.98 (1.43-2.75) |                  | 180/294   | 1.48 (1.17-1.87) |                  |
| <b><i>DRI, revised</i></b>    |           |                  | 0.129            |           |                  | <b>&lt;0.001</b> |
| <b>Low/Interm.</b>            | 123/386   | Reference        |                  | 200/386   | Reference        |                  |
| <b>High/very high</b>         | 44/141    | 1.32 (0.93-1.86) |                  | 98/141    | 1.74 (1.36-2.22) |                  |
| <b><i>Graft source</i></b>    |           |                  | <b>0.009</b>     |           |                  | <b>0.009</b>     |
| <b>BM</b>                     | 12/40     | Reference        |                  | 24/40     | Reference        |                  |
| <b>PBSC</b>                   | 137/453   | 0.71 (0.39-1.28) |                  | 249/453   | 0.64 (0.42-0.97) |                  |
| <b>CBU</b>                    | 18/34     | 1.61 (0.77-3.35) |                  | 25/34     | 1.13 (0.64-1.98) |                  |
| <b><i>GVHD prophyl.</i></b>   |           |                  | 0.673            |           |                  | 0.759            |
| <b>CD34+</b>                  | 90/241    | Reference        |                  | 139/241   | Reference        |                  |
| <b>Unmodified</b>             | 72/265    | 0.87 (0.64-1.19) |                  | 149/265   | 1.08 (0.86-1.37) |                  |
| <b>PT-Cy</b>                  | 5/21      | 0.96 (0.39-2.36) |                  | 10/21     | 1.15 (0.6-2.19)  |                  |
| <b><i>Conditioning</i></b>    |           |                  | <b>0.084</b>     |           |                  | 0.501            |
| <b>Myeloablative</b>          | 117/327   | Reference        |                  | 191/327   | Reference        |                  |
| <b>RIC/NMA</b>                | 50/200    | 0.75 (0.54-1.05) |                  | 107/200   | 0.92 (0.73-1.17) |                  |

|                        |         |                  |              |         |                  |
|------------------------|---------|------------------|--------------|---------|------------------|
| <b>Recipient CMV</b>   |         |                  | <b>0.027</b> |         | <b>0.002</b>     |
| <b>Negative</b>        | 57/208  | Reference        |              | 102/208 | Reference        |
| <b>Positive</b>        | 110/319 | 1.43 (1.04-1.97) |              | 196/319 | 1.45 (1.14-1.84) |
| <b>ADL</b>             |         |                  | <b>0.029</b> |         | <b>0.082</b>     |
| <b>Normal</b>          | 159/507 | Reference        |              | 286/507 | Reference        |
| <b>Impaired</b>        | 8/20    | 2.47 (1.2-5.05)  |              | 12/20   | 1.75 (0.98-3.12) |
| <b>PIM user</b>        |         |                  | <b>0.005</b> |         | <b>0.036</b>     |
| <b>No</b>              | 76/284  | Reference        |              | 151/284 | Reference        |
| <b>Yes</b>             | 91/243  | 1.54 (1.14-2.09) |              | 147/243 | 1.28 (1.02-1.6)  |
| <b>Prior falls</b>     |         |                  | 0.944        |         | 0.563            |
| <b>No</b>              | 136/427 | Reference        |              | 239/427 | Reference        |
| <b>Yes</b>             | 30/99   | 1.01 (0.68-1.51) |              | 58/99   | 1.09 (0.82-1.45) |
| <b>Weight loss</b>     |         |                  | 0.682        |         | 0.116            |
| <b>No</b>              | 139/435 | Reference        |              | 242/435 | Reference        |
| <b>Yes</b>             | 28/92   | 1.09 (0.73-1.64) |              | 56/92   | 1.27 (0.95-1.7)  |
| <b>Albumin</b>         |         |                  | 0.246        |         | 0.107            |
| <b>&lt;3.5</b>         | 12/31   | Reference        |              | 21/31   | Reference        |
| <b>≥3.5</b>            | 155/496 | 0.69 (0.39-1.25) |              | 277/496 | 0.68 (0.44-1.06) |
| <b>Platelet (k/μL)</b> |         |                  | 0.247        |         | 0.164            |
| <b>≥50</b>             | 143/459 | Reference        |              | 257/459 | Reference        |
| <b>&lt;50</b>          | 24/68   | 1.3 (0.84-2.01)  |              | 41/68   | 1.27 (0.92-1.77) |
| <b>Creatinine Cl.</b>  |         |                  | <b>0.03</b>  |         | <b>0.032</b>     |
| <b>≥60</b>             | 144/472 | Reference        |              | 261/472 | Reference        |
| <b>&lt;60</b>          | 23/55   | 1.69 (1.08-2.62) |              | 37/55   | 1.49 (1.05-2.1)  |

**Abbreviations:** No., Number of events; Total, Number of patients with each variable; HR, Hazard Ratio; CI, Confidence Interval; KPS, Karnofsky Performance Scale; HCT-CI, Hematopoietic cell transplantation-comorbidity index; DRI, Disease Risk Index; Interm., Intermediate; BM, Bone Marrow; PBSC, Peripheral Blood Stem Cell; CBU, Cord Blood Unit; RIC/NMA, Reduced-intensity/non-myeloablative conditioning; CMV, Cytomegalovirus; GVHD, Graft versus host disease; PT-Cy, Post-transplant cyclophosphamide; ADL, Activities of Daily Living; PIM, Potentially inappropriate medication; Creatinine Cl., Creatinine Clearance in milliliter/minute

**Supplemental Table 4. Examples of Prevention and Treatment Strategies**

| <b>Delirium (references 32, 42, 47)</b>                                         | <b>Fall (references 36, 41, 48)</b>                                           |
|---------------------------------------------------------------------------------|-------------------------------------------------------------------------------|
| Early recognition of risk factors                                               | Early recognition of risk factors                                             |
| Engage family caregiver and volunteers                                          | Intensified physical and occupational therapy                                 |
| Treat modifiable risk factors, infections, metabolic, toxic, acute illness etc. | Assess visual and hearing impairments and provide assistive devices as needed |
| Meticulous medication management                                                | Meticulous medication management                                              |
| Nonpharmacologic approaches first before antipsychotic agents                   | Vitamin D supplementation                                                     |
| Proactive, multifactorial nonpharmacologic delirium prevention protocols        | Proactive, multifactorial nonpharmacologic fall prevention protocols          |
| Proactive geriatric consultation in high risk patients                          | Rehabilitation consultation                                                   |
